# Supplementary material for: Topological Vortexes, Asymptotic Freedom and Multifractals
Source: Preprints.org preprint supplement (doi:10.20944/preprints202303.0383.v1), 2023-03-22
Supplement: Supplementary file 13 [file supplementary]

A dark blue outline of a house, consisting of a triangular roof and a rectangular base. The letters 'MDPI' are centered within the house shape.

**MDPI**
