# Supplementary figures and images for: Topological Vortexes, Asymptotic Freedom and Multifractals
Source: Preprints.org preprint supplement (doi:10.20944/preprints202303.0383.v1), 2023-03-22

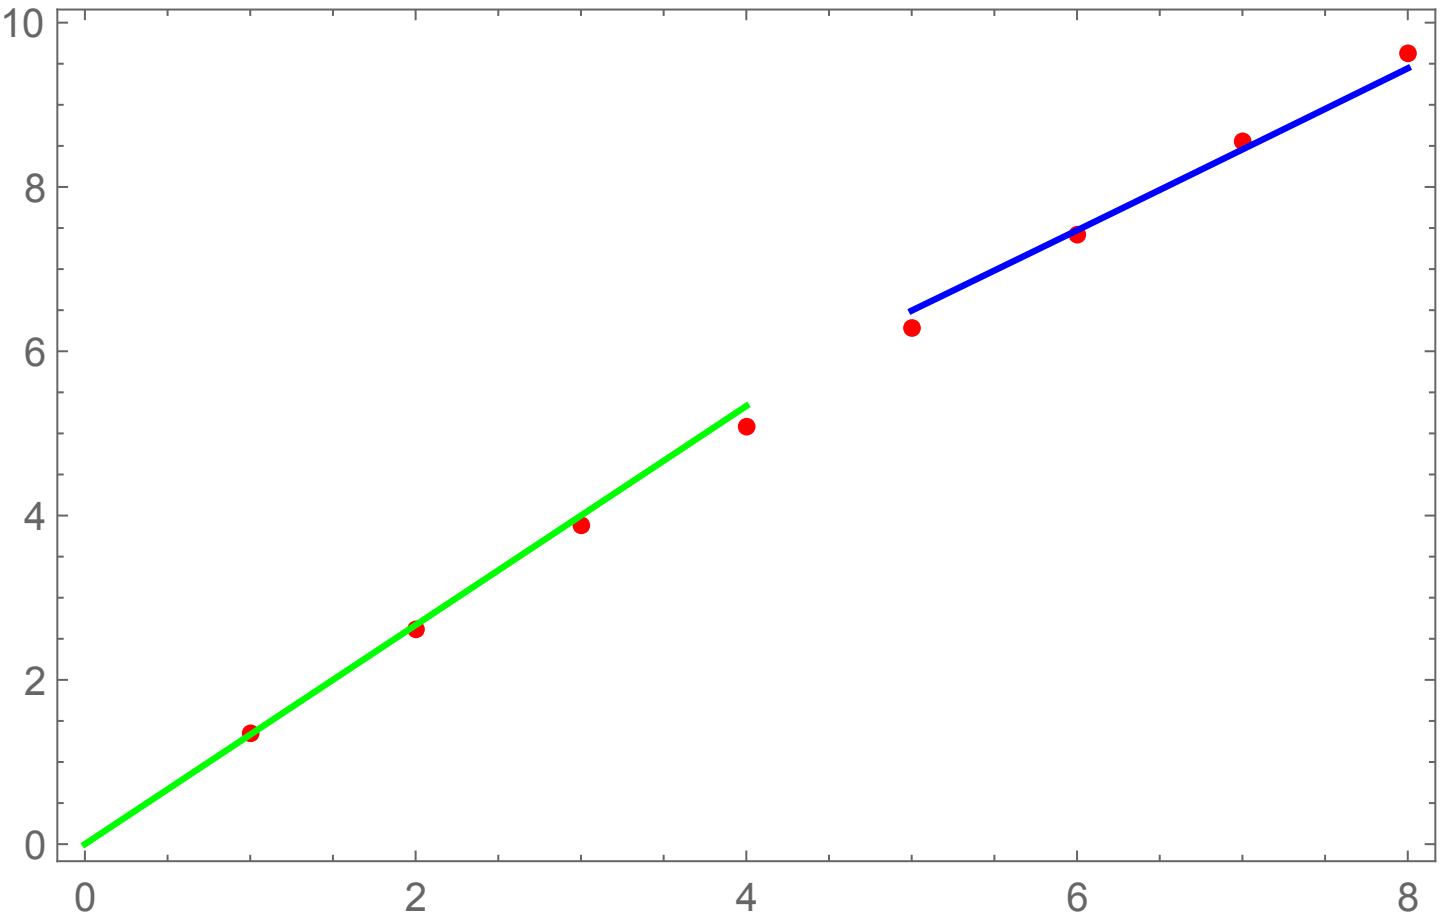

Supplement: Supplementary file 1 [file supplementary]

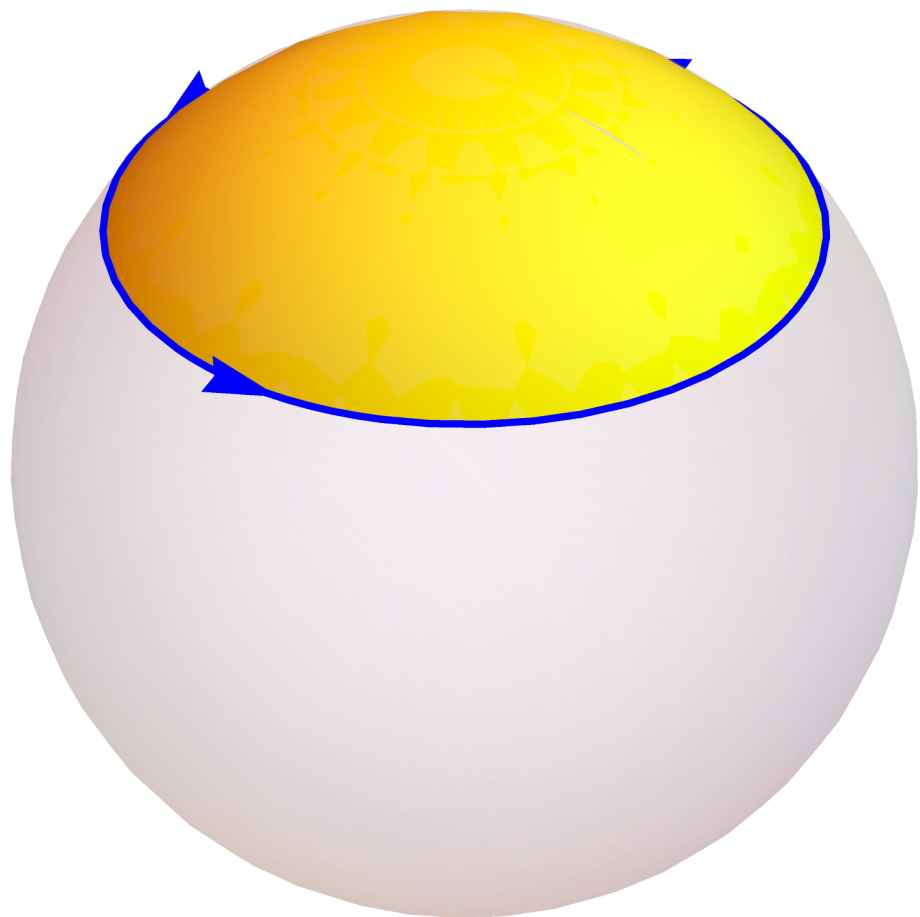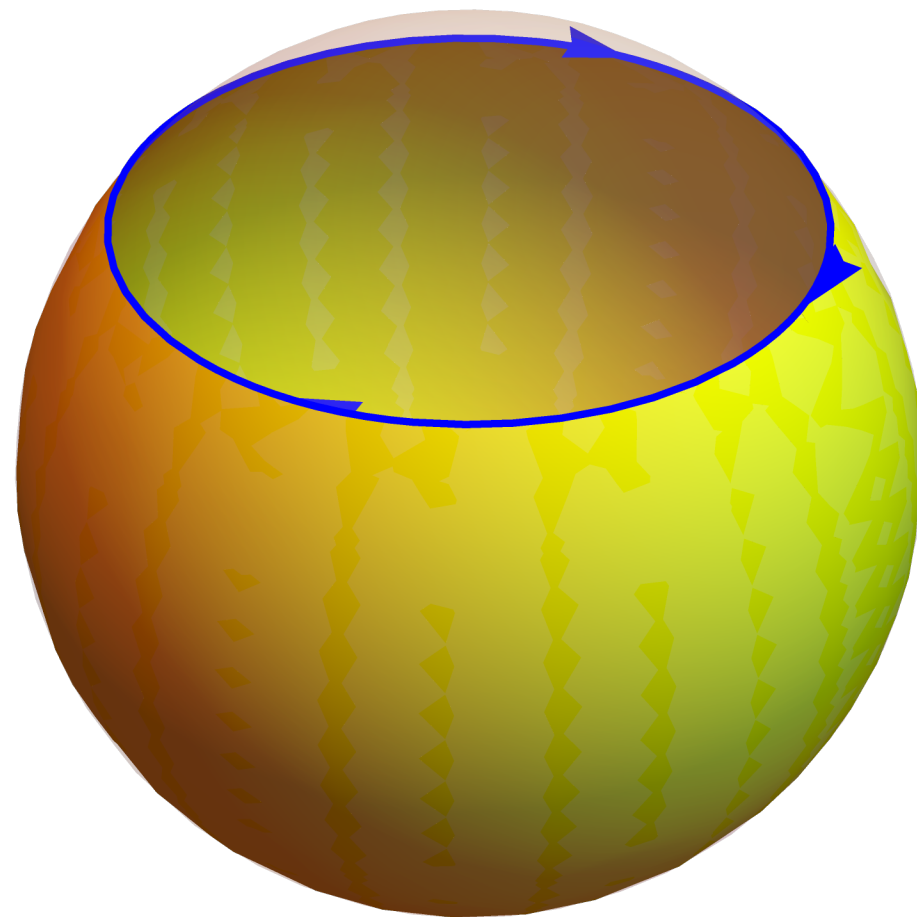

Supplement: Supplementary file 2 [file supplementary]

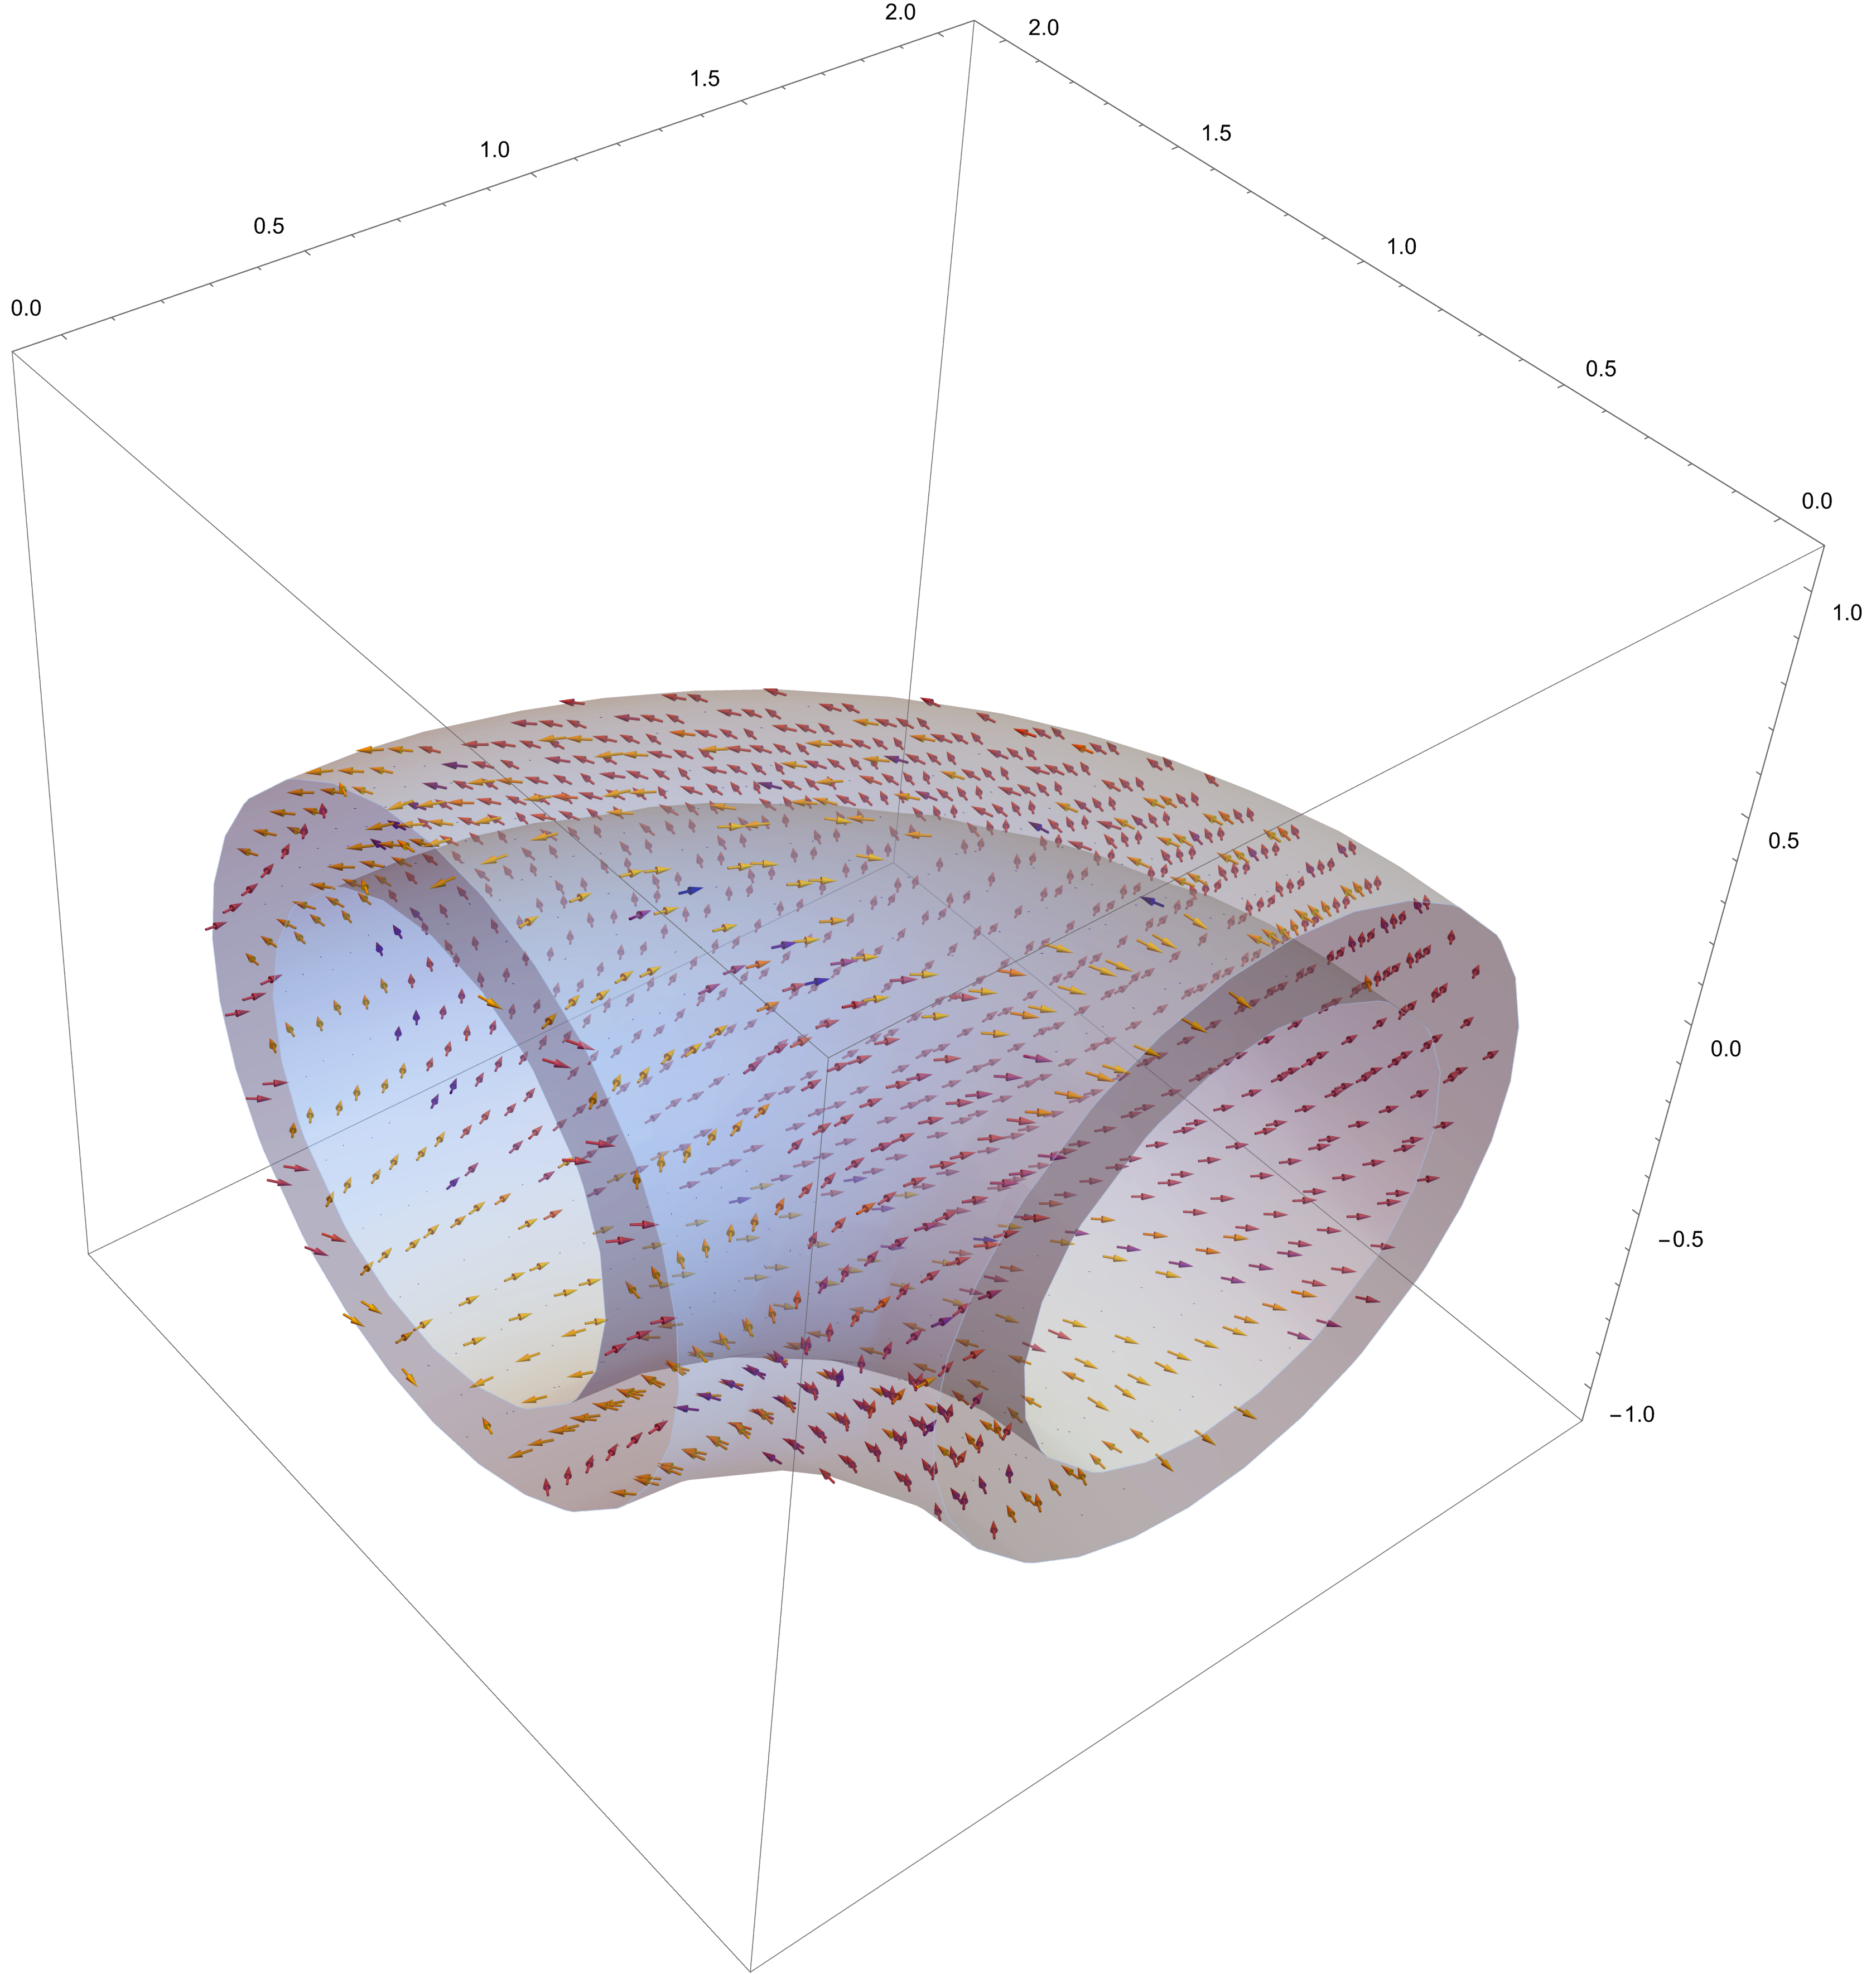

Supplement: Supplementary file 3 [file supplementary]

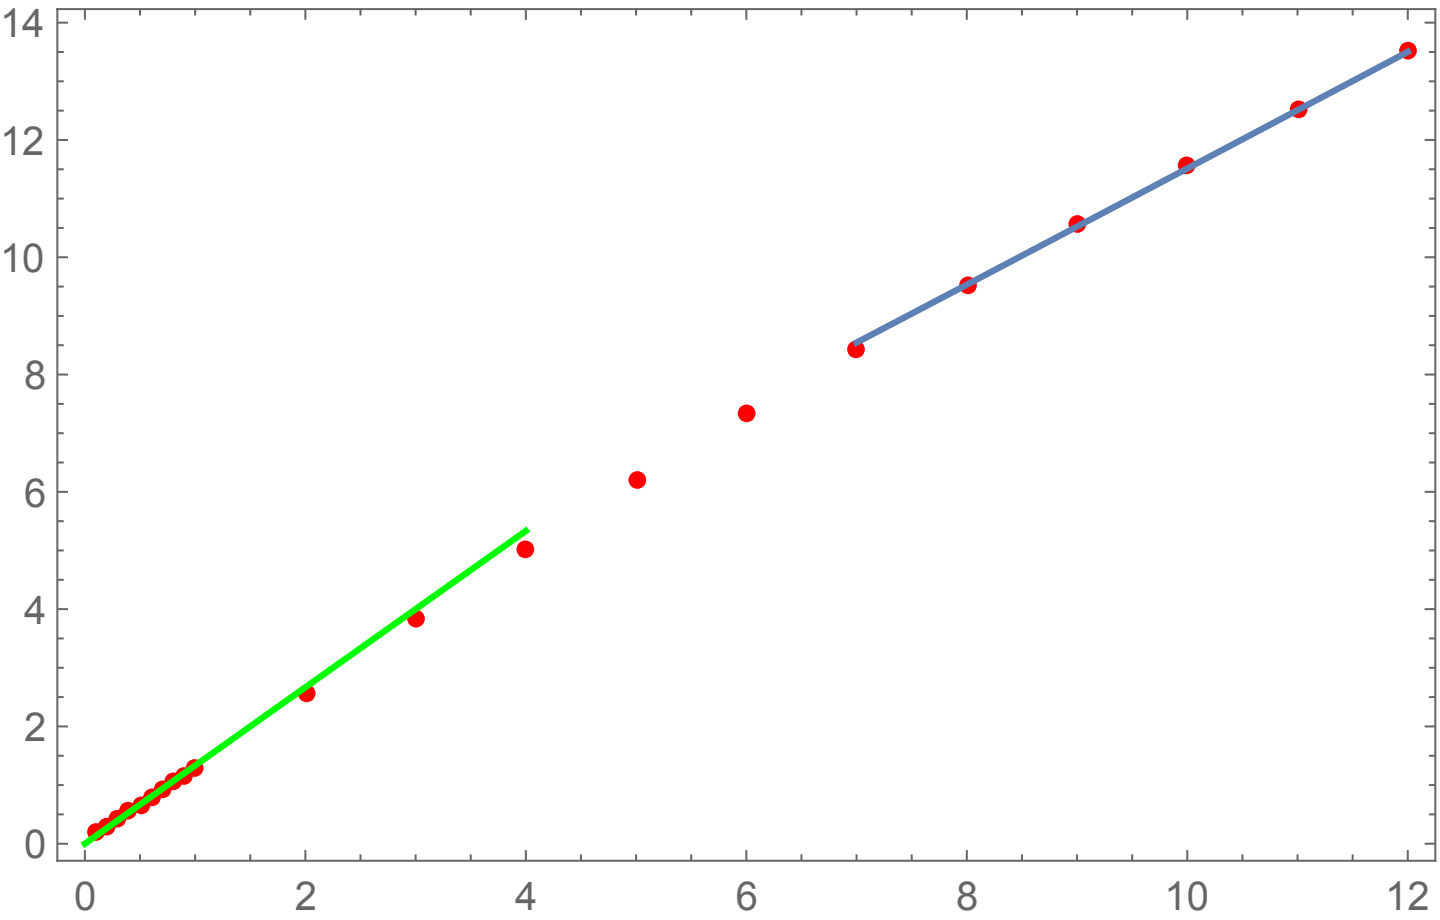

Supplement: Supplementary file 4 [file supplementary]

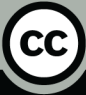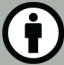

BY

Supplement: Supplementary file 5 [file supplementary]

$\Gamma < 0$

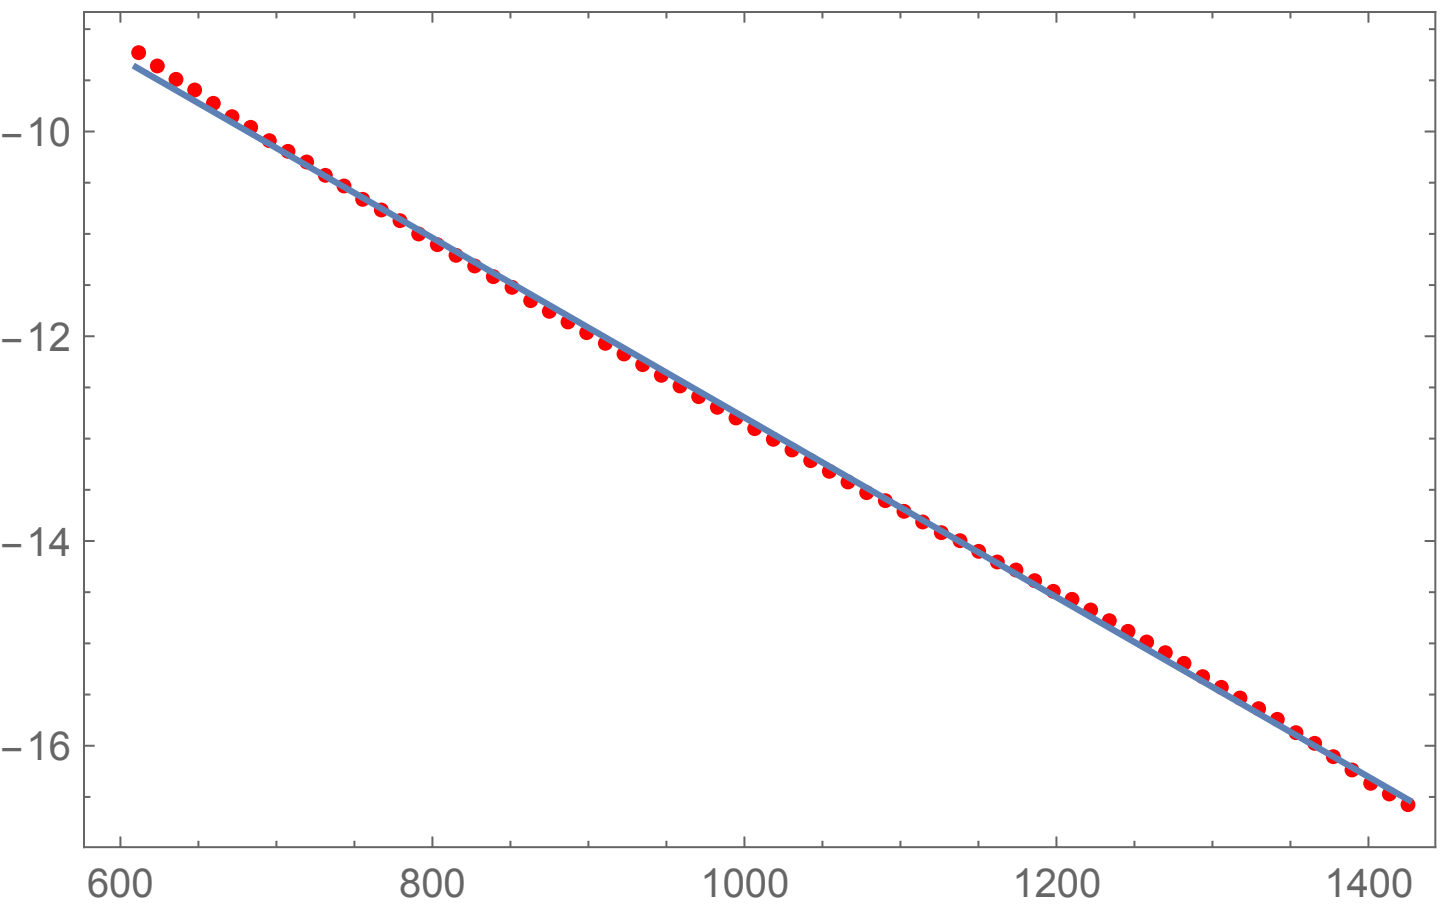

Supplement: Supplementary file 6 [file supplementary]

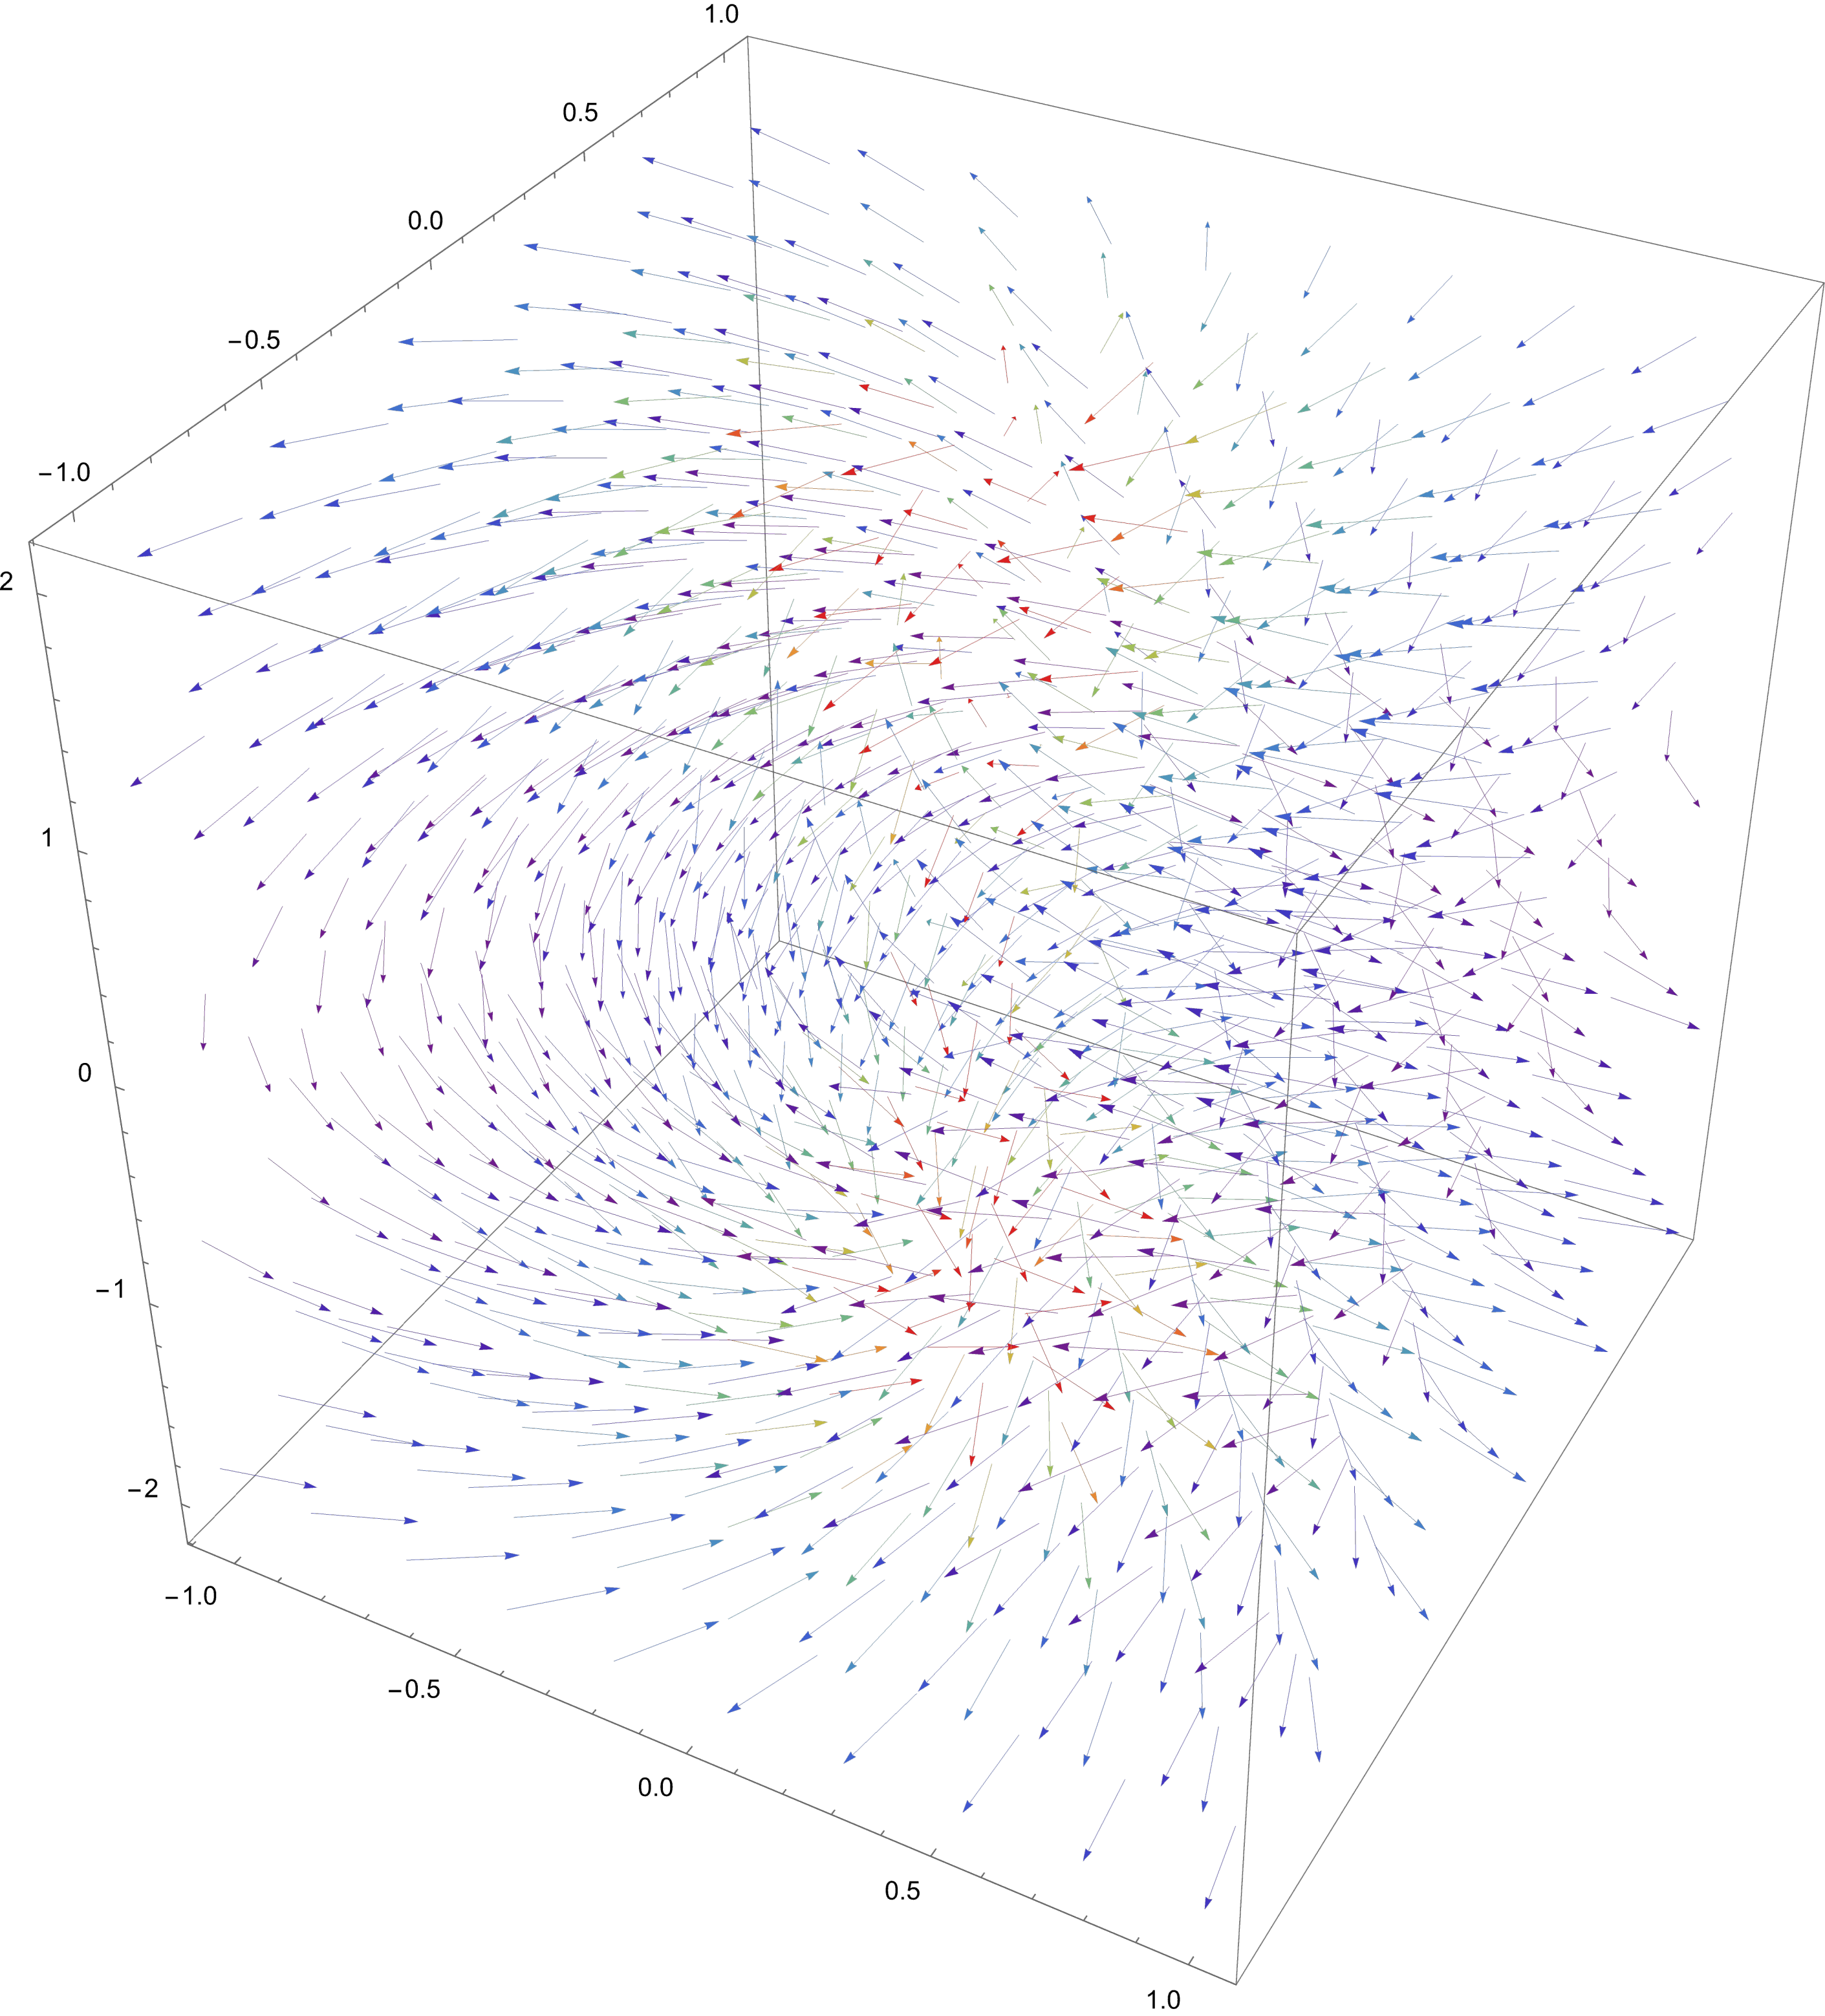

Supplement: Supplementary file 7 [file supplementary]

$\Gamma > 0$

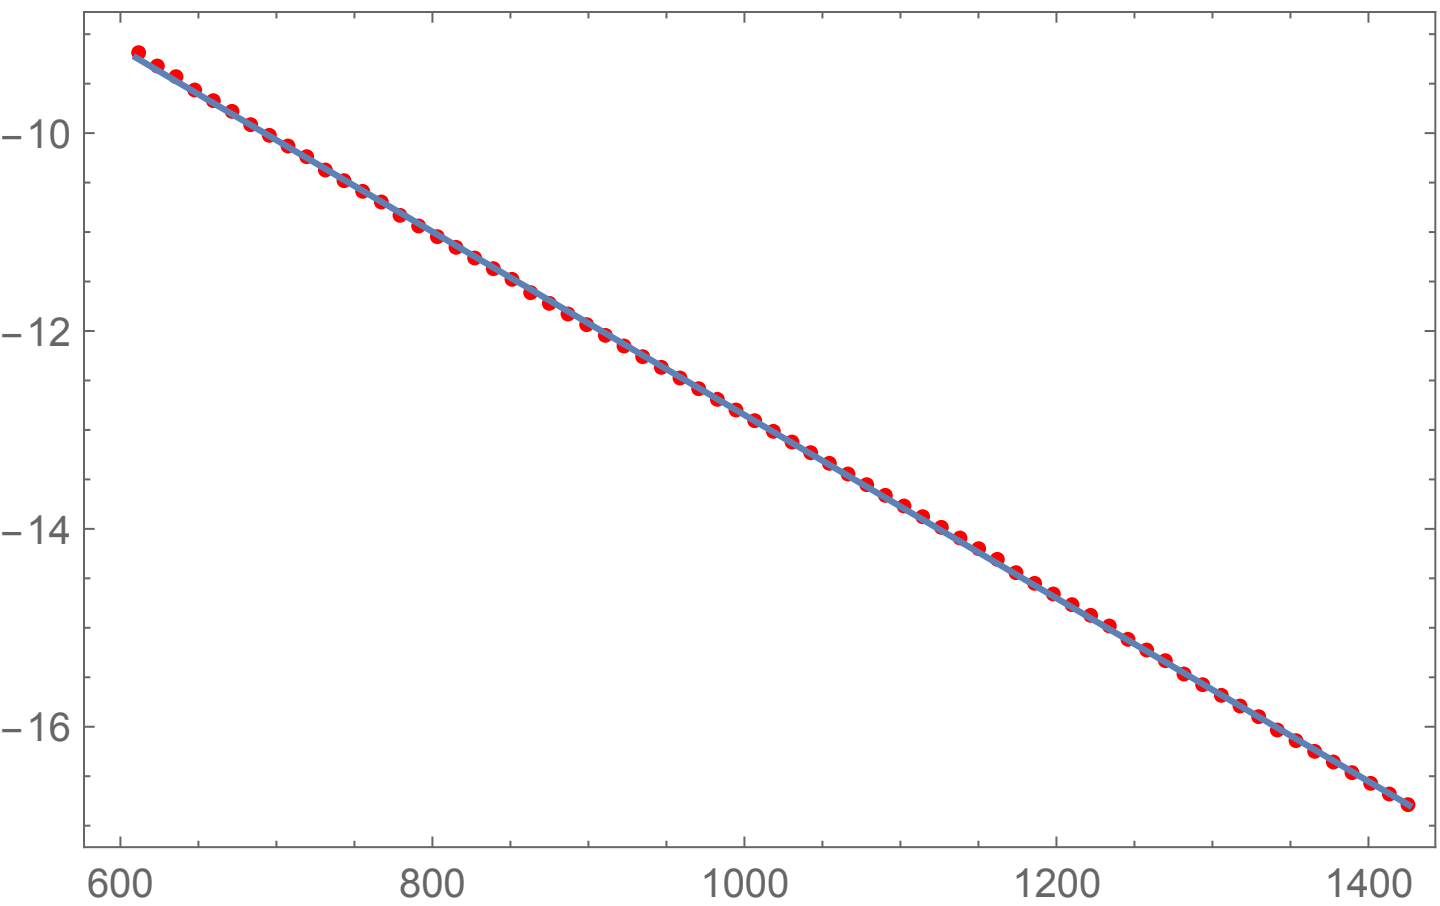

Supplement: Supplementary file 8 [file supplementary]

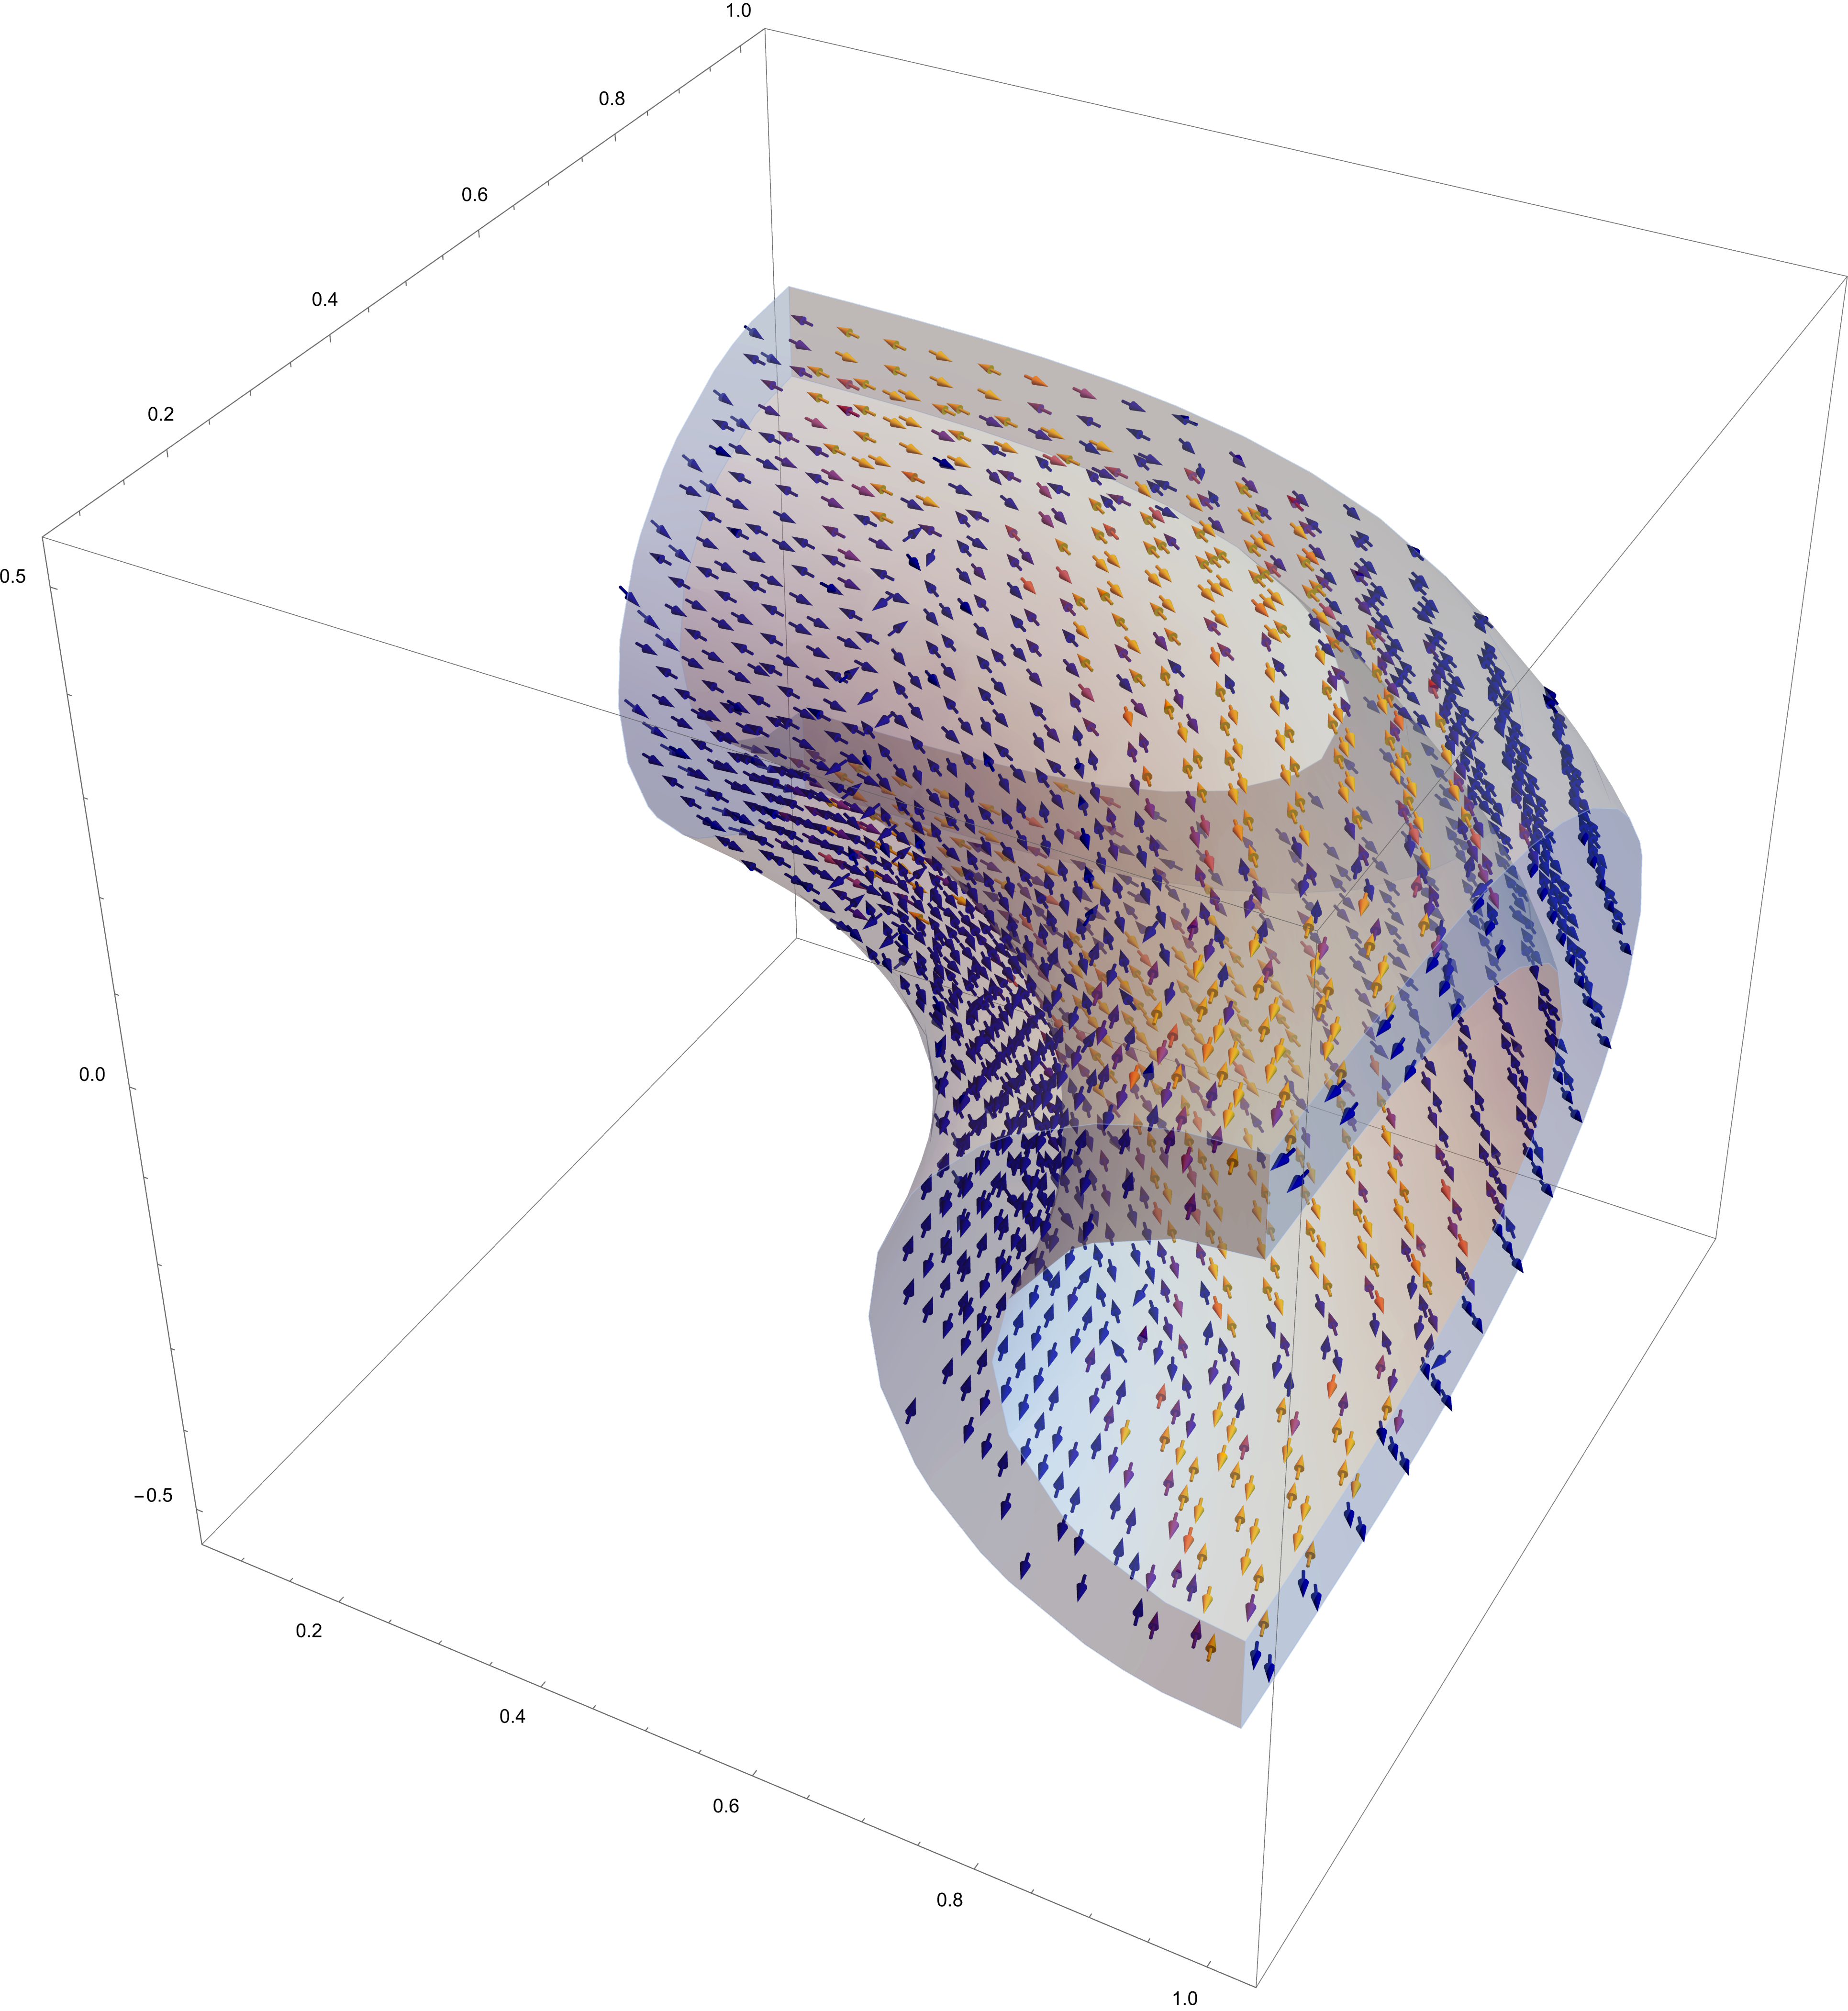

Supplement: Supplementary file 9 [file supplementary]

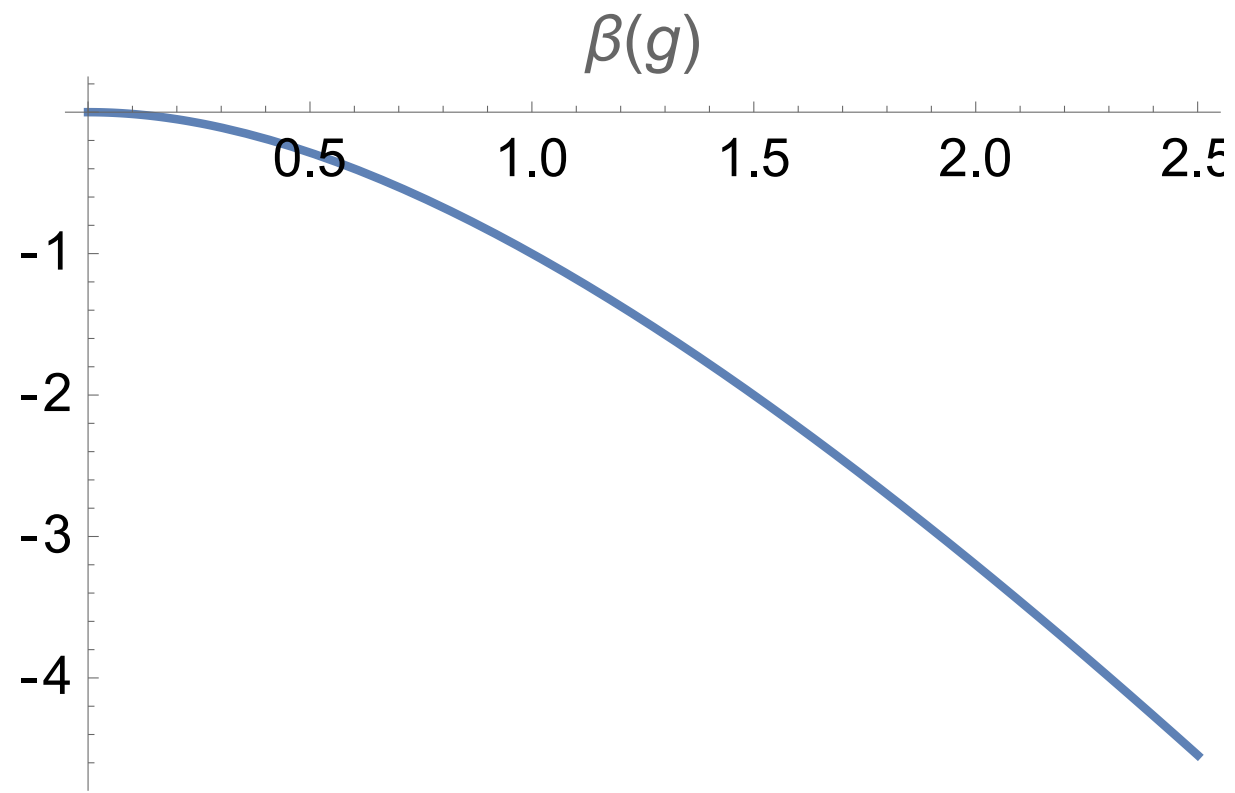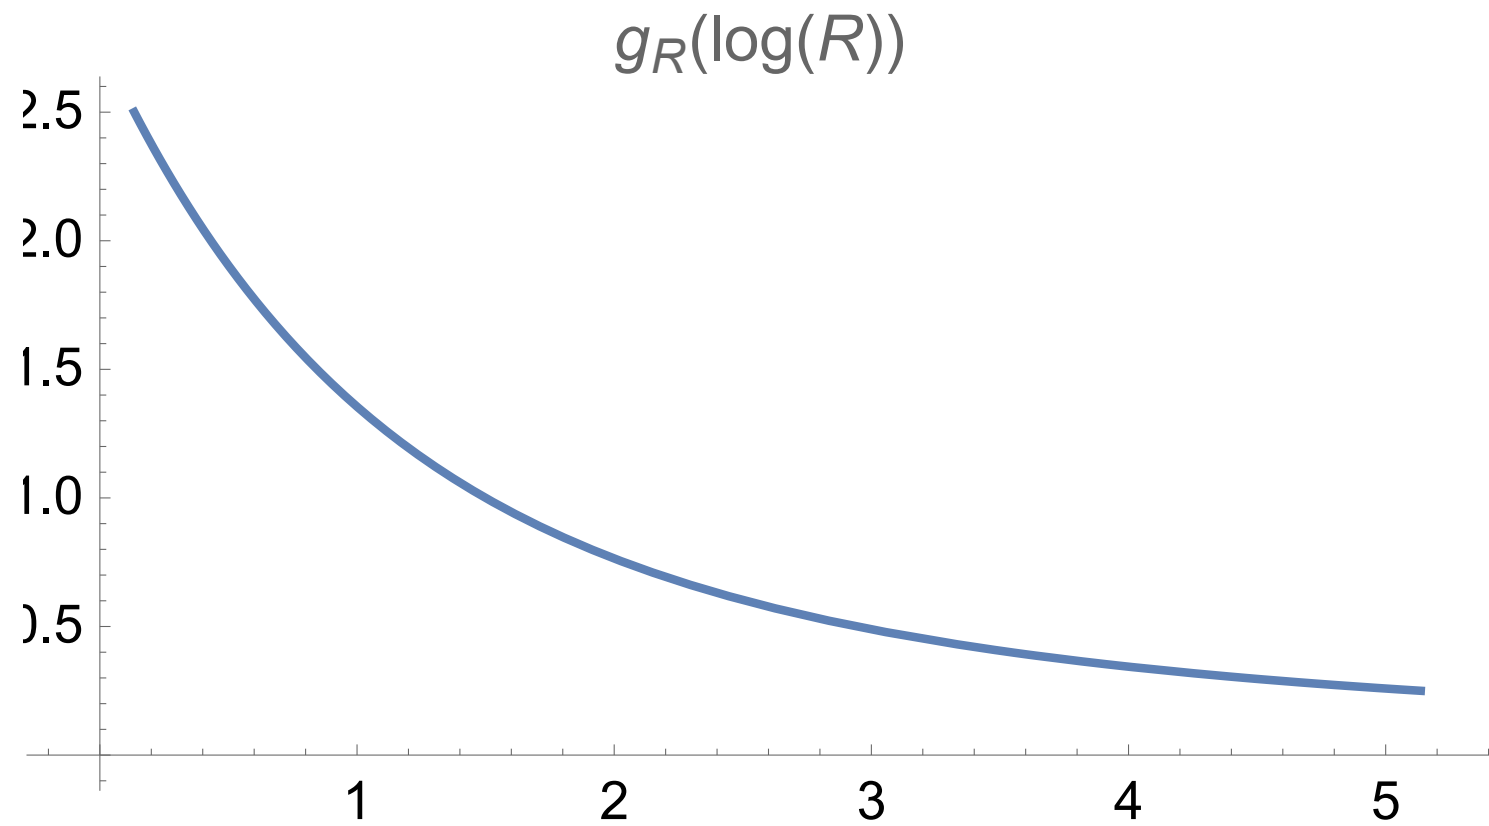

Supplement: Supplementary file 10 [file supplementary]

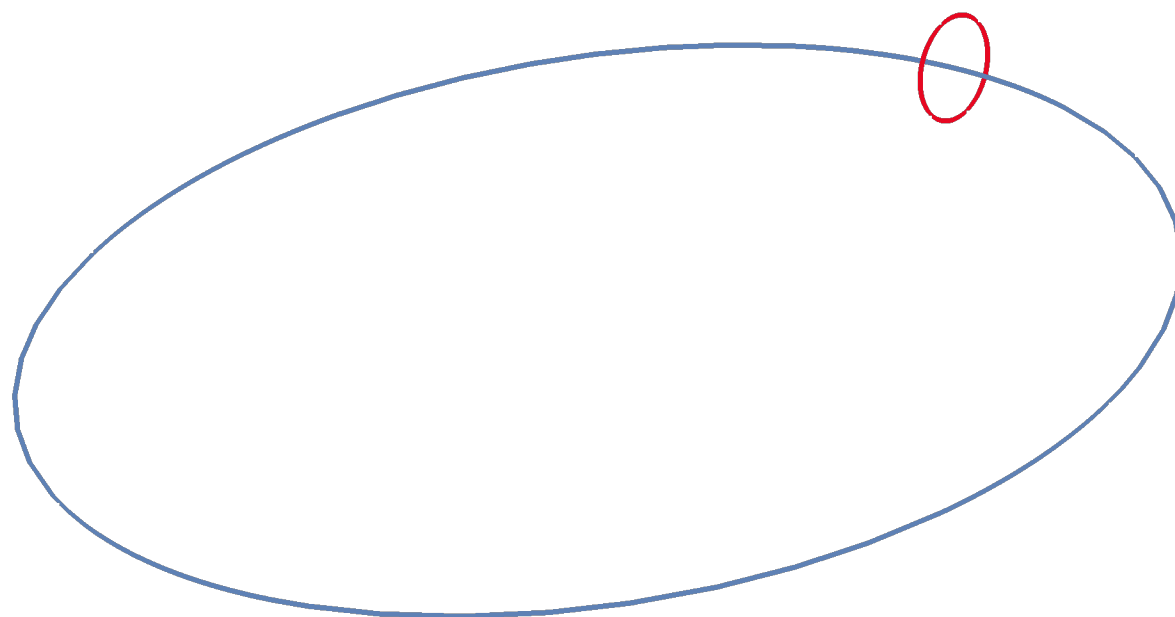

Supplement: Supplementary file 11 [file supplementary]

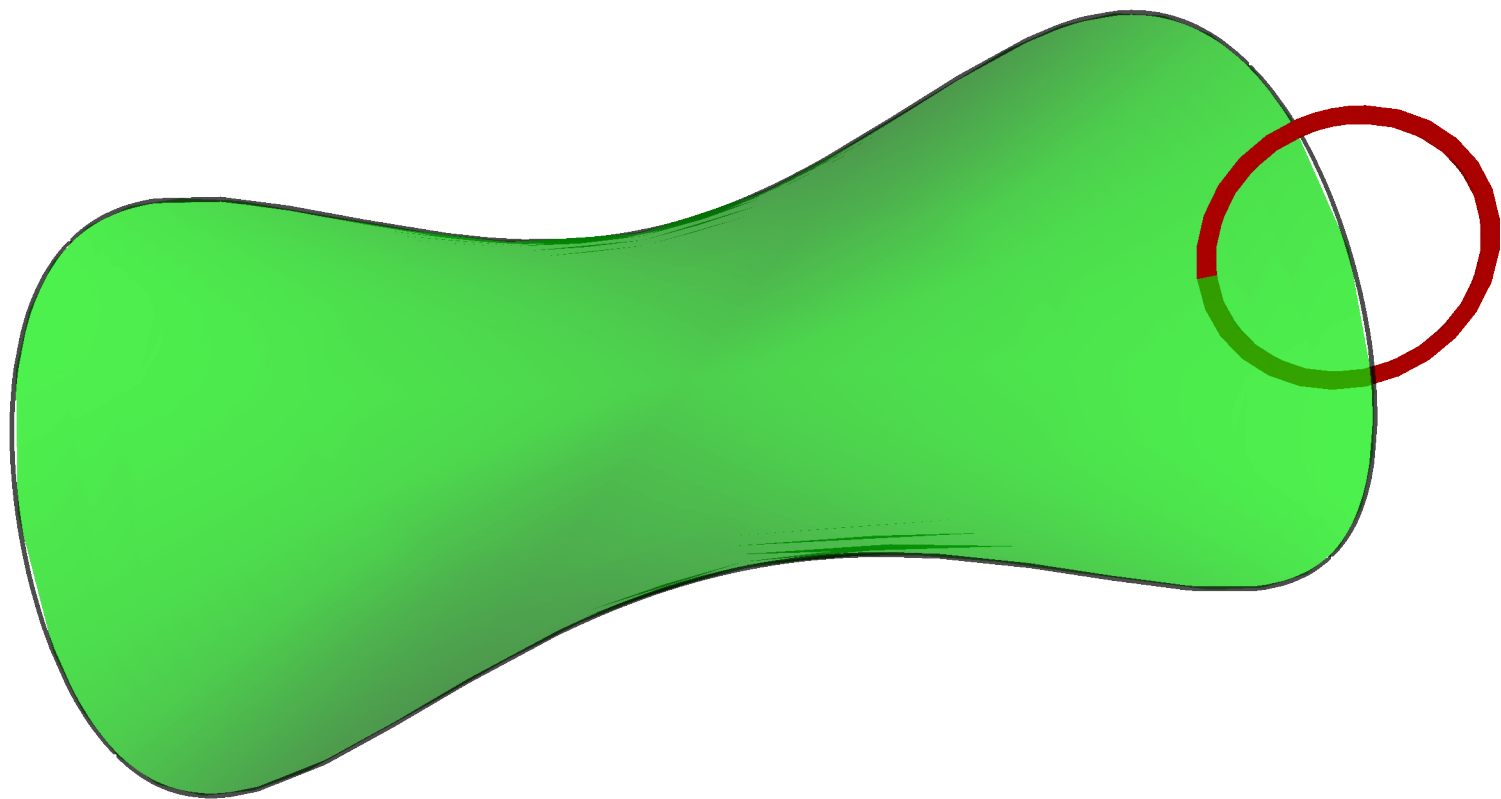

Supplement: Supplementary file 12 [file supplementary]

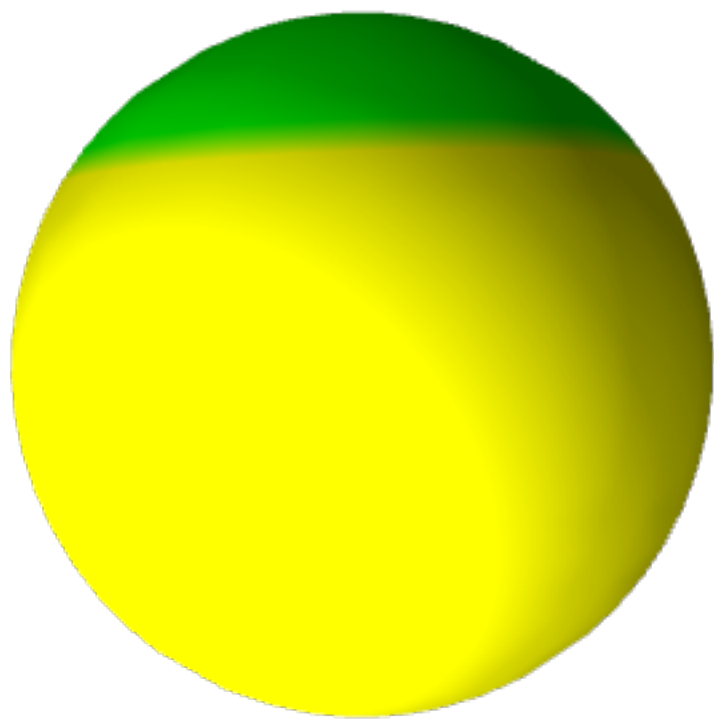

Supplement: Supplementary file 14 [file supplementary]
